# Supplementary material for: S-doped Ti3C2F2 MXene as an ideal sulfur cathode host for high-performance rechargeable lithium–sulfur batteries
Source: Royal Society of Chemistry journal article supplement (doi:10.1039/d3ta03518b), 2023-01-01
Supplement: d3ta03518b1.pdf [file d3ta03518b1.pdf]

## Supporting Information

### **S-Doped $\text{Ti}_3\text{C}_2\text{F}_2$ MXene as an Ideal Sulfur Cathode Host for High-Performance Rechargeable Lithium-Sulfur Batteries**

Hao Yuan, Jing Yang, and Yong Wei Zhang\*

Institute of High Performance Computing (IHPC), Agency for Science, Technology and Research (A\*STAR), 1 Fusionopolis Way, #16-16 Connexis, Singapore 138632, Republic of Singapore

**\*Corresponding Author**

zhangyw@ihpc.a-star.edu.sg

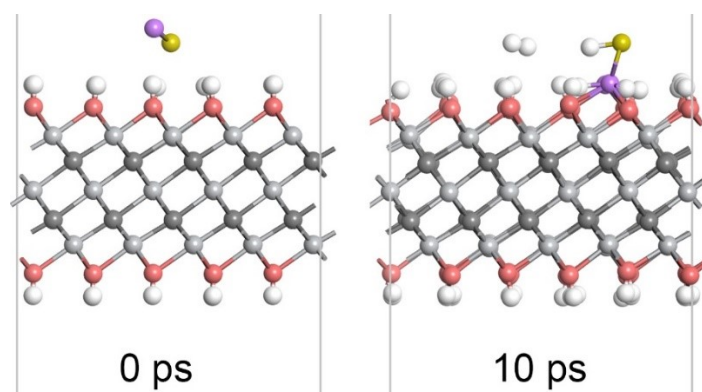

**Fig S1.** AIMD snapshots of  $\text{Li}_2\text{S}$  on  $\text{Ti}_3\text{C}_2(\text{OH})_2$  at 0 and 10 ps.

**Table S1.**  $\text{Li}_2\text{S}$  diffusion and decomposition barriers (units: eV) on MXenes.

|                                     | $\text{Ti}_3\text{C}_2\text{F}_2$ | $\text{Ti}_3\text{C}_2\text{O}_2$ | $\text{Ti}_3\text{C}_2\text{S}_2$ |
|-------------------------------------|-----------------------------------|-----------------------------------|-----------------------------------|
| $\text{Li}_2\text{S}$ diffusion     | 0.1                               | 1.15                              | 1.38                              |
| $\text{Li}_2\text{S}$ decomposition | 1.35                              | 0.47                              | 0.34                              |

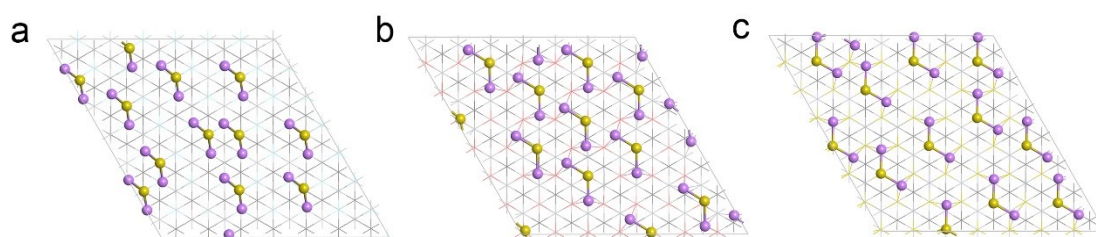

**Fig S2.** Initial structures with a high concentration  $\text{Li}_2\text{S}$  on a)  $\text{Ti}_3\text{C}_2\text{F}_2$ , b)  $\text{Ti}_3\text{C}_2\text{O}_2$  and c)  $\text{Ti}_3\text{C}_2\text{S}_2$ .

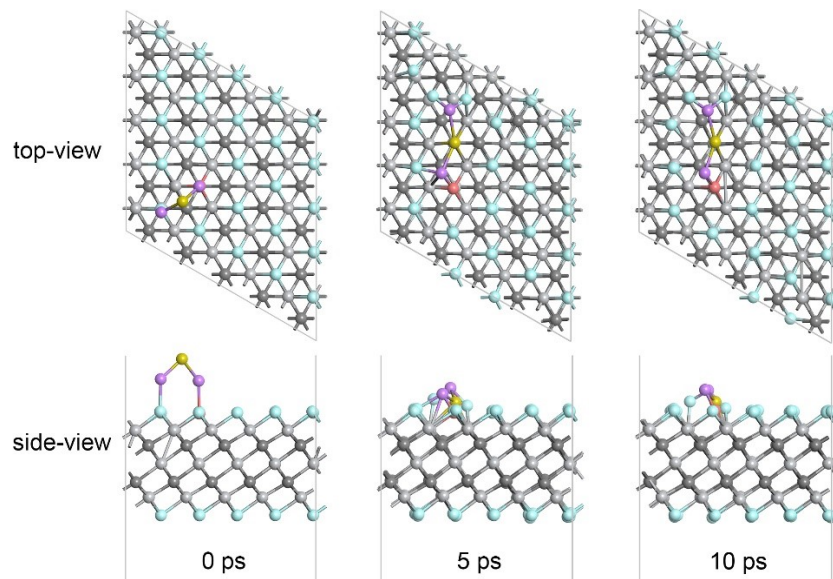

**Fig S3.** Snapshots of  $\text{Li}_2\text{S}$  on  $\text{O@Ti}_3\text{C}_2\text{F}_2$ .

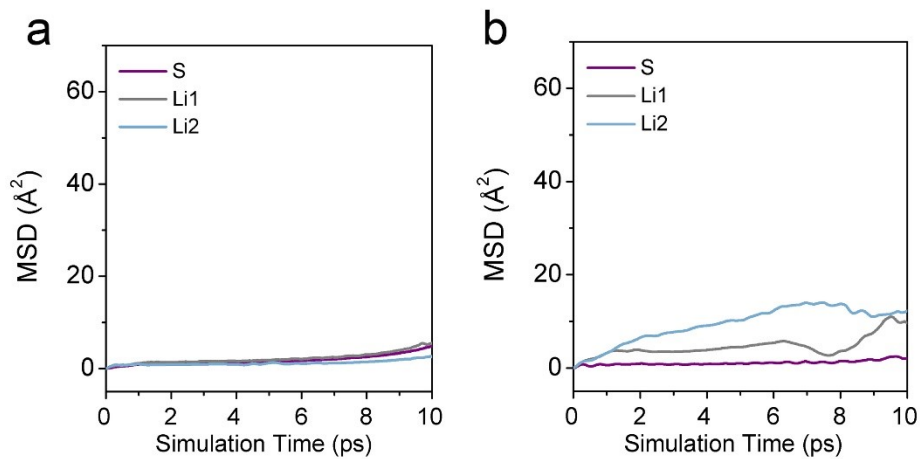

**Fig S4.** Calculated MSD of Li and S on a)  $\text{O@Ti}_3\text{C}_2\text{F}_2$  and b)  $\text{S@Ti}_3\text{C}_2\text{F}_2$  as a function of simulation time.

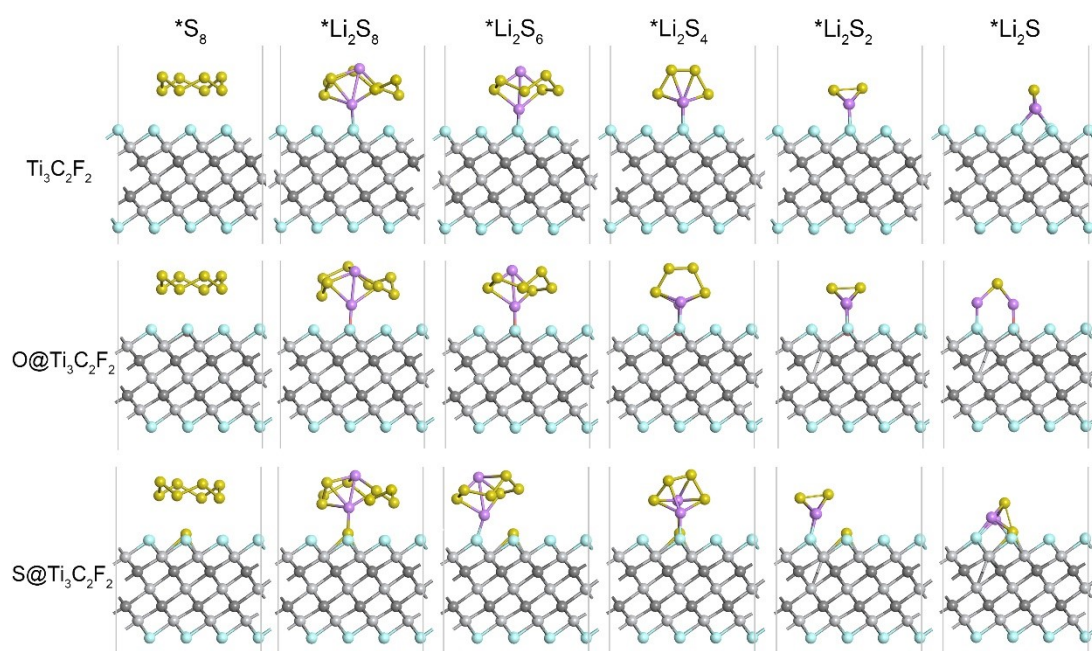

**Fig S5.** Adsorption configurations of polysulfides on  $Ti_3C_2F_2$ ,  $O@Ti_3C_2F_2$  and  $S@Ti_3C_2F_2$ .

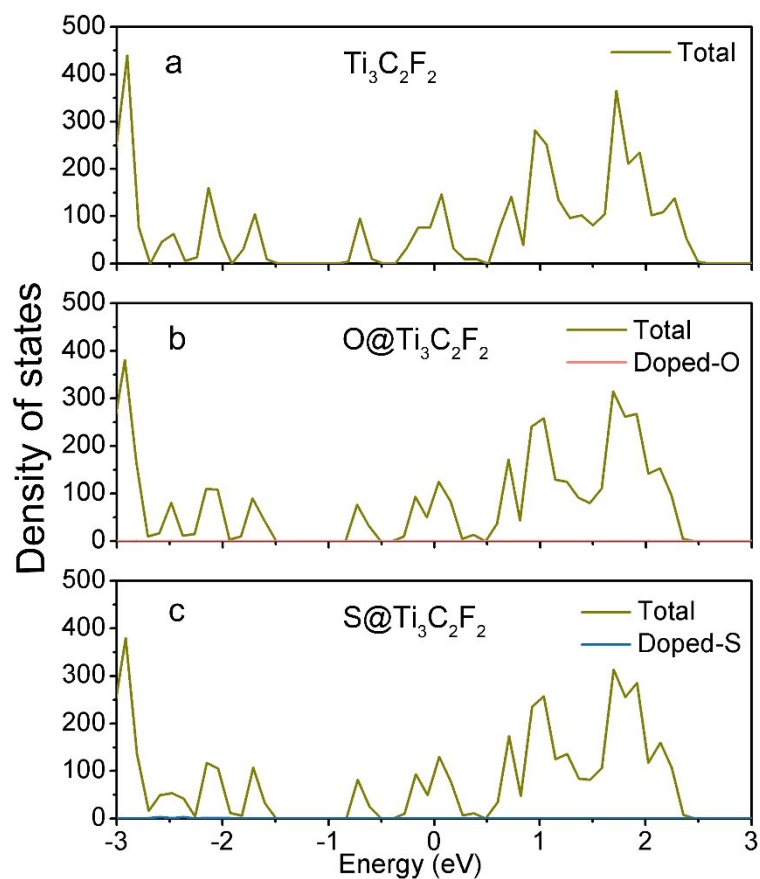

Fig S6. Density of states of a)  $\text{Ti}_3\text{C}_2\text{F}_2$ , b)  $\text{O}@\text{Ti}_3\text{C}_2\text{F}_2$  and c)  $\text{S}@\text{Ti}_3\text{C}_2\text{F}_2$ .

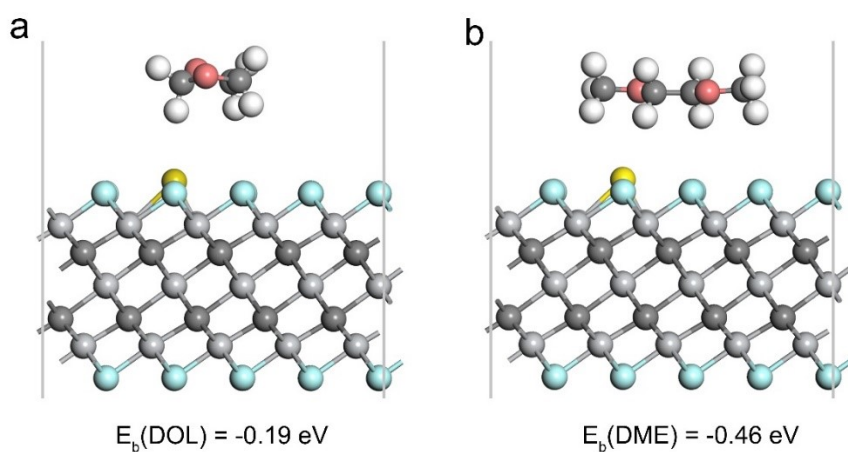

Fig S7. The adsorption configurations and adsorption energies of DOL and DME on  $\text{S}@\text{Ti}_3\text{C}_2\text{F}_2$  are shown in a) and b), respectively.
